# Supplementary material for: Novel Immortalized Human Multipotent Mesenchymal Stromal Cell Line for Studying Hormonal Signaling
Source: MDPI journal article supplement (doi:10.3390/ijms25042421), 2024-02-19
Supplement: s1 [file s1]

**Table S1.** Primer sequences and amplification parameters used in the study.

| Gene                  | Primer name | Nucleotide sequence (5' -> 3') | Annealing T, °C | Amplicon length, bp |
|-----------------------|-------------|--------------------------------|-----------------|---------------------|
| <i>TERT</i>           | TERT_qPCR_f | ACCGTGTTTCTGTGTGGTG            | 58              | 211                 |
|                       | TERT_qPCR_r | TCGCCTGAGGAGTAGAGGAA           |                 |                     |
| <i>RPLP0</i>          | RPLP0_h_f   | GCTGCTGCCCCGTGCTGGTG           | 63              | 130                 |
|                       | RPLP0_h_r   | TGGTGCCCCCTGGAGATTTTAGTGG      |                 |                     |
| <i>RunX2</i>          | RunX2_f     | TCTTAGAACAAATTCTGCCCTTT        | 56              | 136                 |
|                       | RunX2_r     | TGCTTTGGTCTTGAAATCACA          |                 |                     |
| <i>OCN/<br/>BGLAP</i> | OCN_f       | AGCAAAGGTGCAGCCTTTGT           | 58              | 62                  |
|                       | OCN_r       | CGCCTGGGTCTCTTCACT             |                 |                     |
| <i>PPARG</i>          | PPARg_f     | TCAGGTTTGGGCGGATGC             | 59.5            | 147                 |
|                       | PPARg_r     | TCAGCGGGAAGGACTTTATGTATG       |                 |                     |
| <i>AdipoQ</i>         | AdipoQ_f    | GACCAGGAAACCACGACTCA           | 59              | 199                 |
|                       | AdipoQ_r    | TTTCACCGATGTCTCCCTTAGG         |                 |                     |

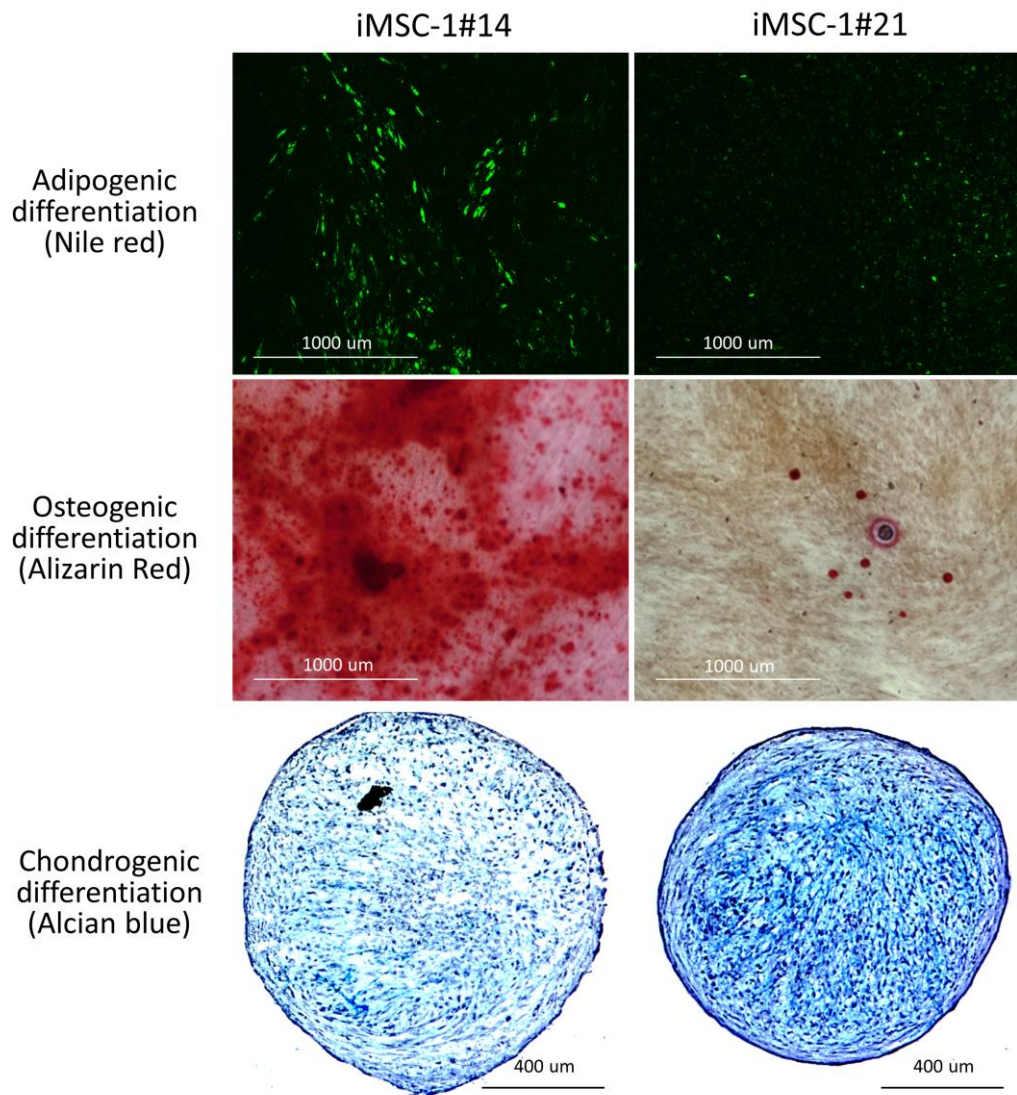

**Figure S1.** iMSC-1 differentiation potential at passages 14 and 21: MSCs cultured in appropriate differentiation medium for 2 weeks. Adipogenic differentiation was assessed by Nile red staining of accumulated lipids (green fluorescence), osteogenic differentiation - by Alizarin red staining of calcium deposits (red color) and chondrogenic differentiation - by Alcian blue staining of cartilage acidic glycosaminoglycans (light blue color).

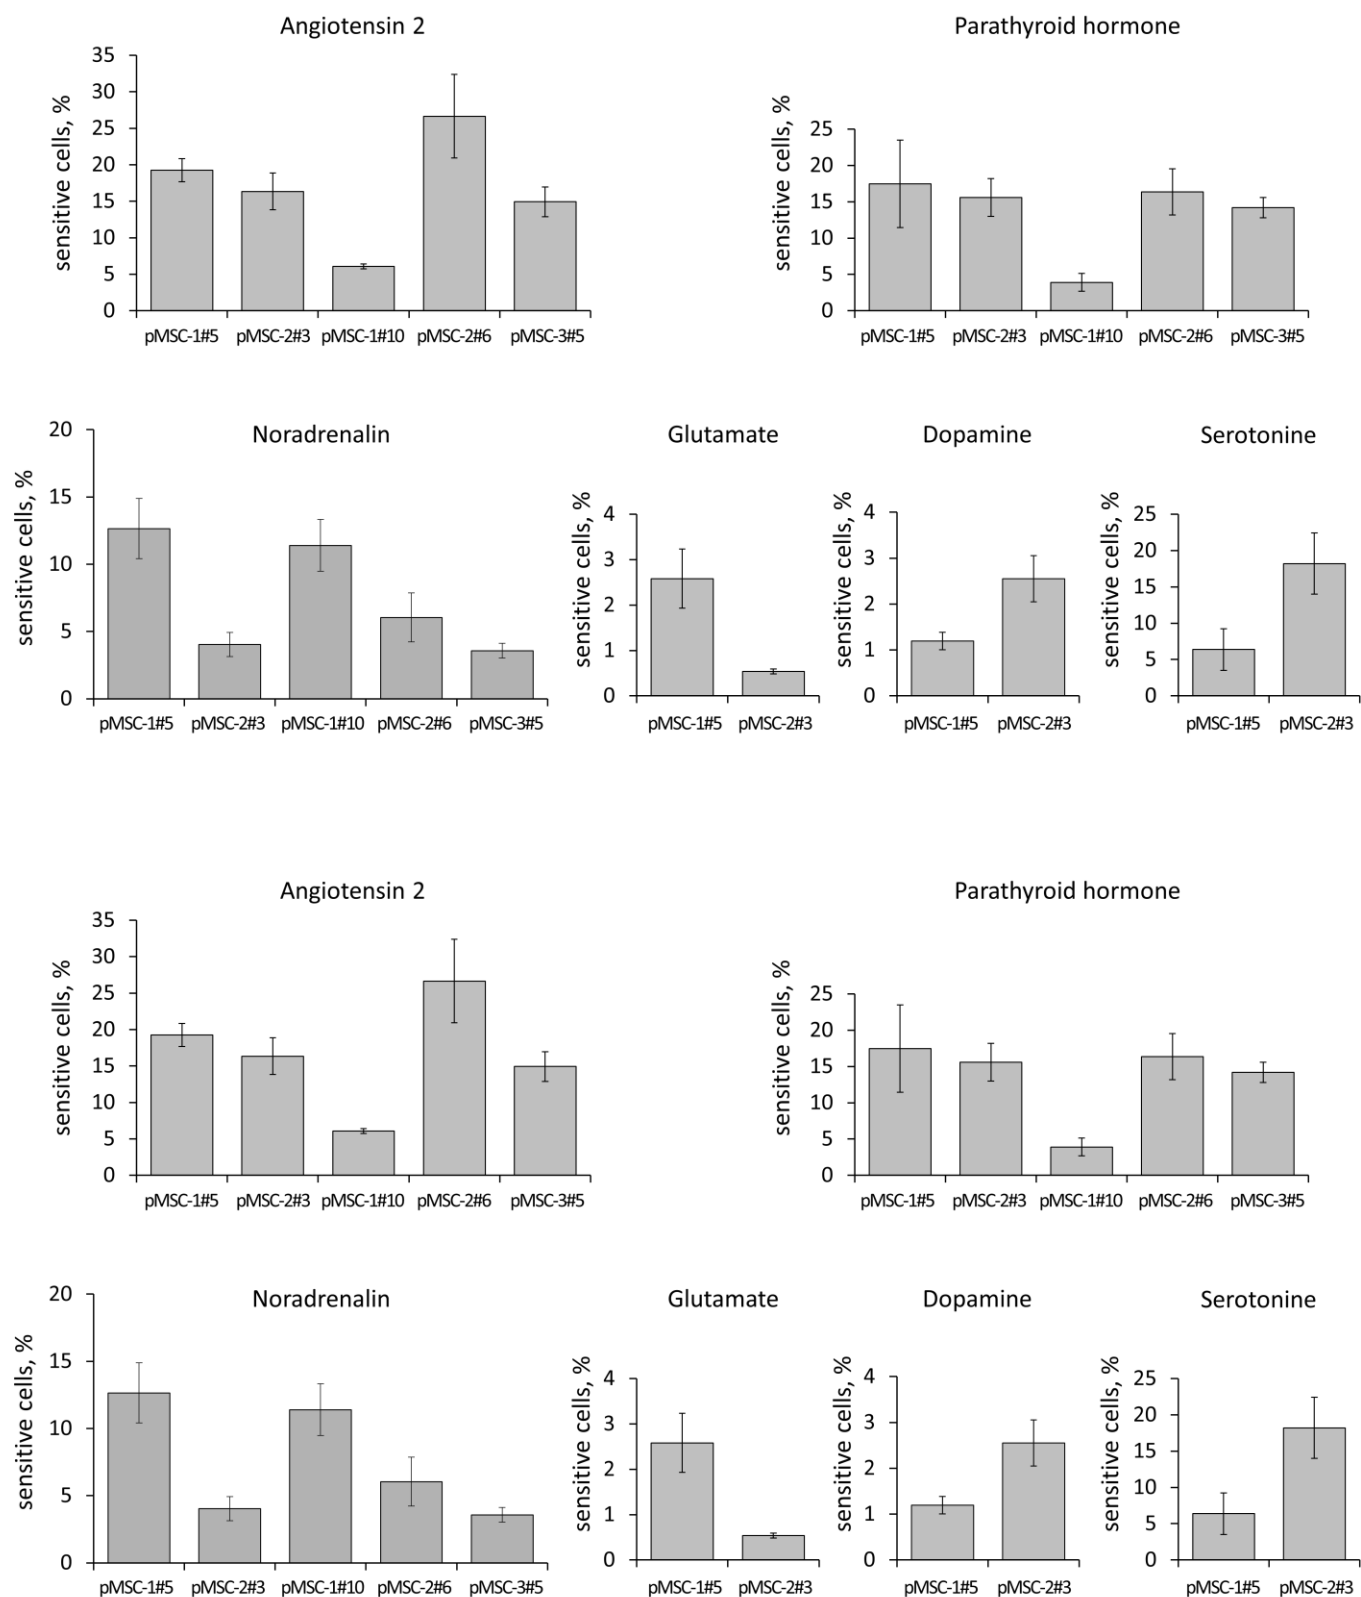

**Figure S2.** Hormonal sensitivity of primary MSC cultures (#1-3) at passages 3-10 (n ≥ 3).

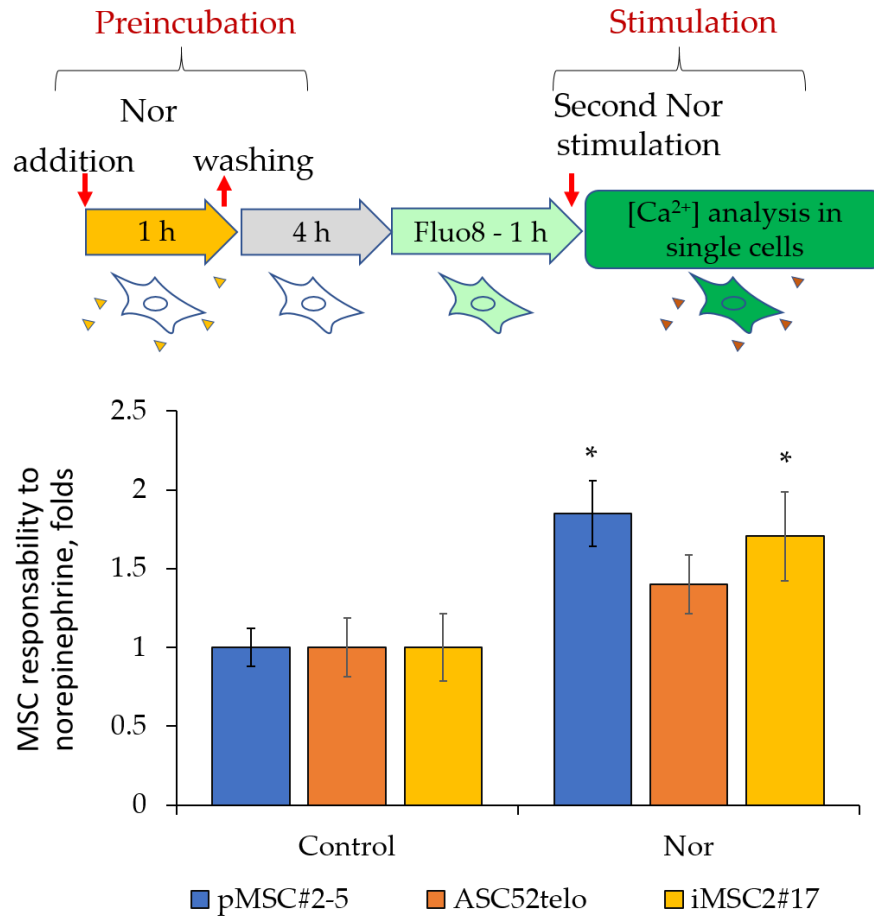

**Figure S3.** Hormonal sensitization of iMSC cell culture. \* - p < 0.05 vs corresponding cell culture in the control group (non-pretreated with noradrenaline), n ≥ 6.

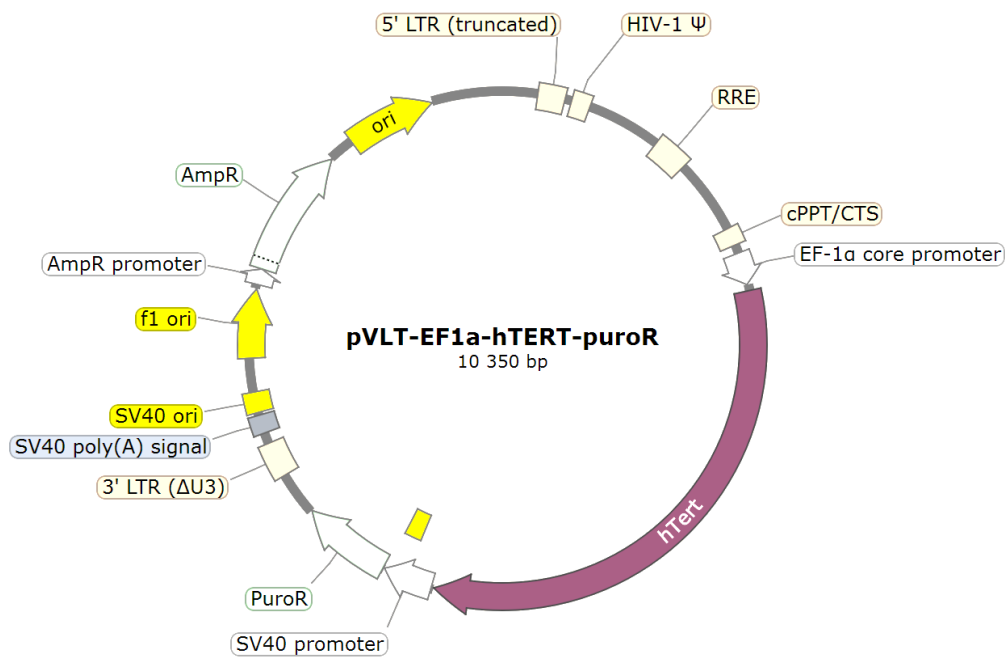

**Figure S4.** Map of the lentiviral transfer vector pVLT-EF1a-hTERT-puroR used for immortalization of MSC cell cultures.
